# Supplementary material for: Metal-polyphenol nanoshells for enhancing the thermostability of a single viral vaccine
Source: Royal Society of Chemistry journal article supplement (doi:10.1039/d4qm00529e), 2024-01-01
Supplement: d4qm00529e1.pdf [file d4qm00529e1.pdf]

Supporting Information for  
**Metal-Polyphenol Nanoshells for Enhancing the  
Thermostability of Single Viral Vaccine**

Qin Liu<sup>a,b</sup>, Xia Zhao<sup>a</sup>, Yuan Lin<sup>a\*</sup>, Zhaohui Su<sup>a,b\*</sup>

<sup>a</sup>*State Key Laboratory of Polymer Physics and Chemistry, Changchun Institute of Applied Chemistry, Chinese Academy of Sciences, Changchun 130022, China.*

<sup>b</sup>*School of Applied Chemistry and Engineering, University of Science and Technology of China, Hefei 230026, China*

\*Correspondence should be addressed to Yuan Lin and Zhaohui Su: 5625 Renmin Street, Changchun, Jilin, 130022, P.R. China.; Email: [linyuan@ciac.ac.cn](mailto:linyuan@ciac.ac.cn); [zhsu@ciac.ac.cn](mailto:zhsu@ciac.ac.cn). Telephone: 86-0431-85262658; Fax: 86-0431-85262126.

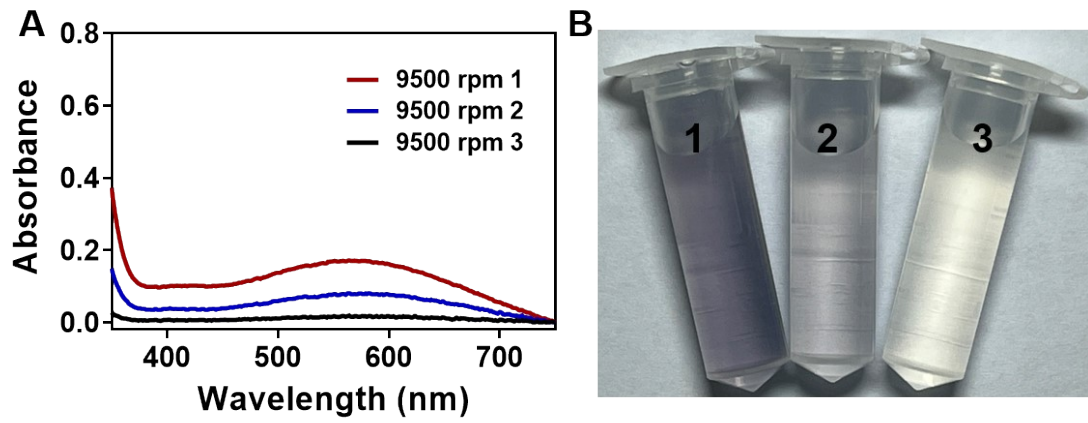

**Figure S1.** UV-vis absorption spectra (A) and optical images (B) of the supernatant of TMV@TA-FeIII after washed with water and centrifuged at 9500 rpm three times.

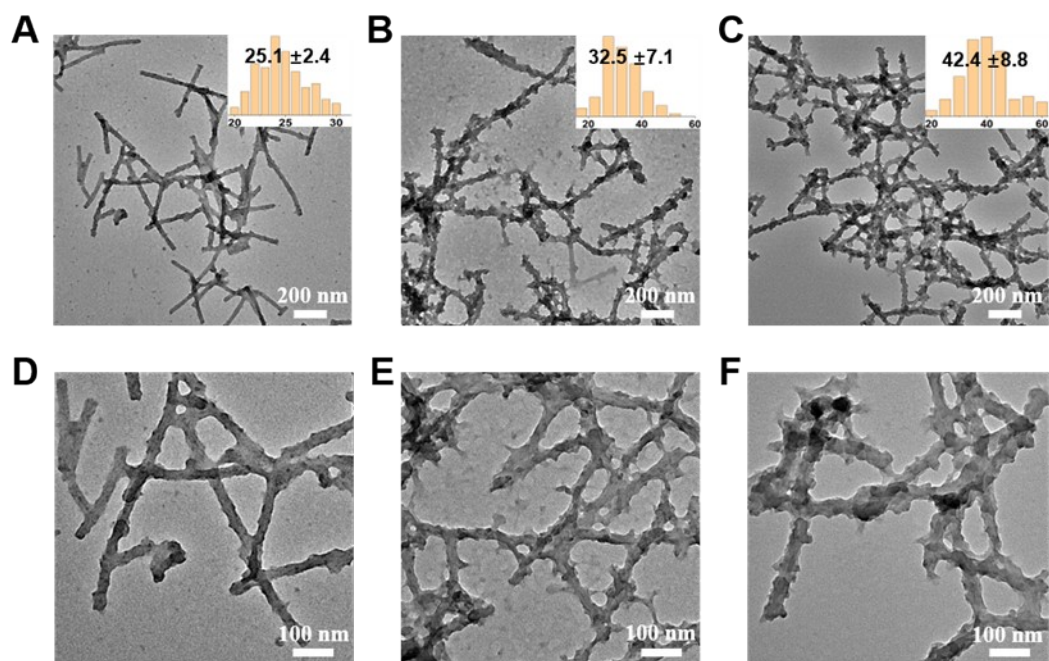

**Figure S2.** Morphological characterization of TMV@TA-Fe<sup>III</sup> with different concentrations of Fe<sup>III</sup>. (A, D) 0.15 mM (B, E) 0.30 mM and (C, F) 0.45 mM.

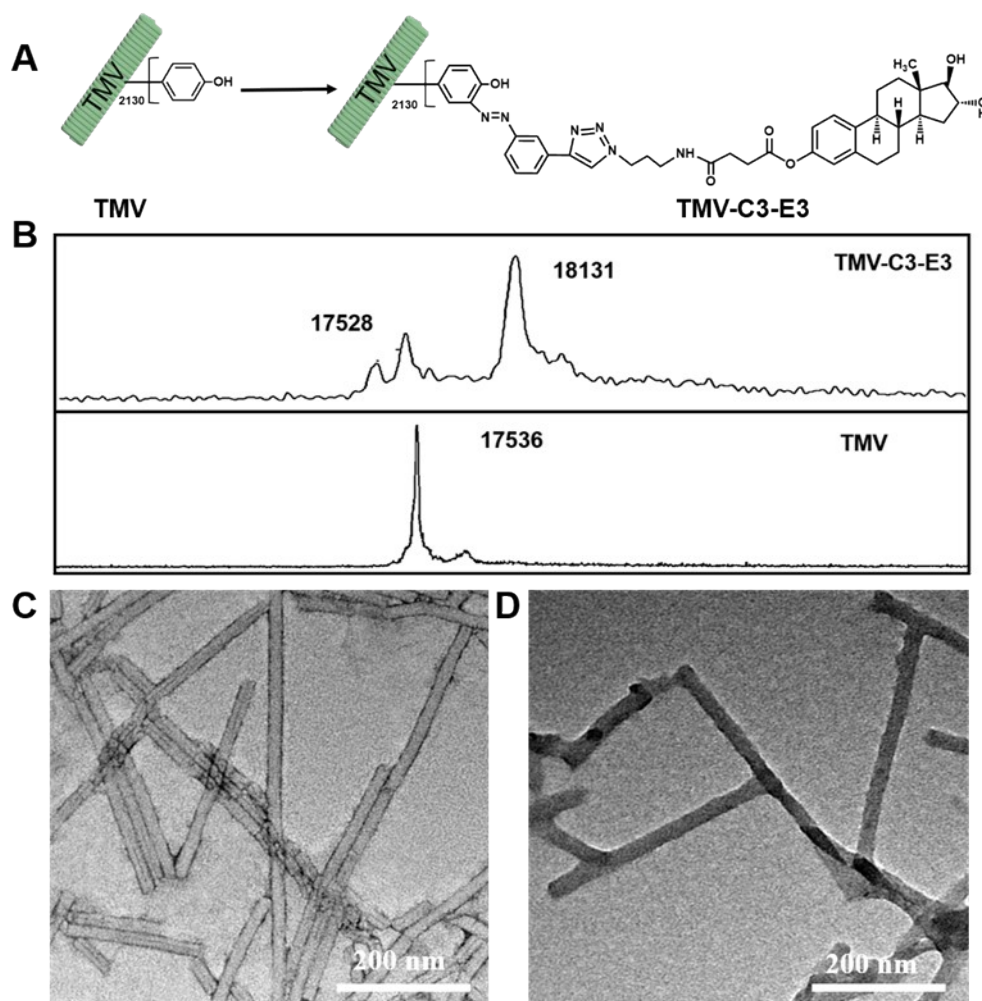

**Figure S3.** (A) Preparation TMV-C3-E3 conjugates by means of diazonium-coupling and CuAAC reactions. (B) MALDI-TOF MS spectra of the subunits of TMV (theoretical  $m/z$  17534) and TMV-C3-E3 conjugates (theoretical  $m/z$  18133). (C) TEM images of TMV-E<sub>3</sub> and (D) TMV-C3-E3@TA-Fe<sup>III</sup>.

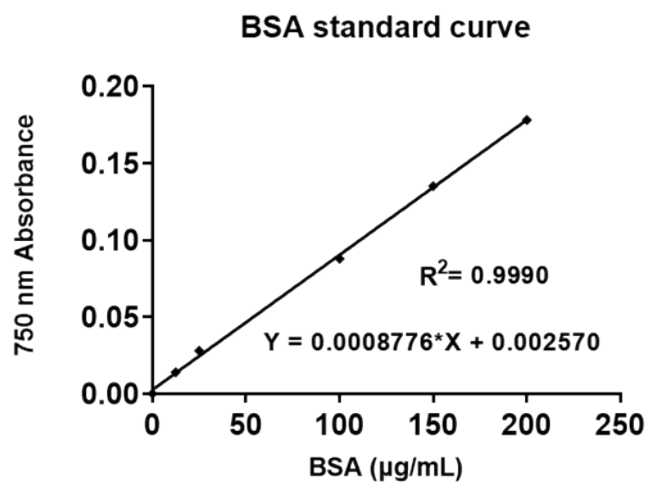

|                              | Concentration ( $\mu\text{g/mL}$ ) |
|------------------------------|------------------------------------|
| TMV-wt                       | 22.62                              |
| TMV@TA-<br>Fe <sup>III</sup> | 33.75                              |

**Figure S4.** Measurement of TMV and TMV@TA-Fe<sup>III</sup> concentration by Lowry kit for measuring coat protein activity. Tested after exfoliated TMV@TA-Fe with EDTA and dialyzed against water overnight to remove EDTA.

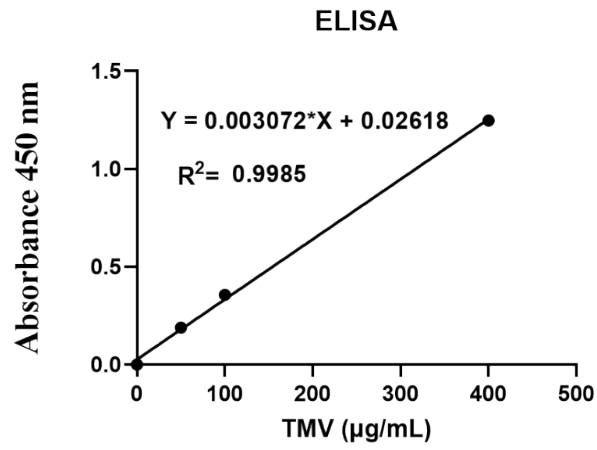

**Figure S5.** ELISA kit for the test of viral RNA activity.

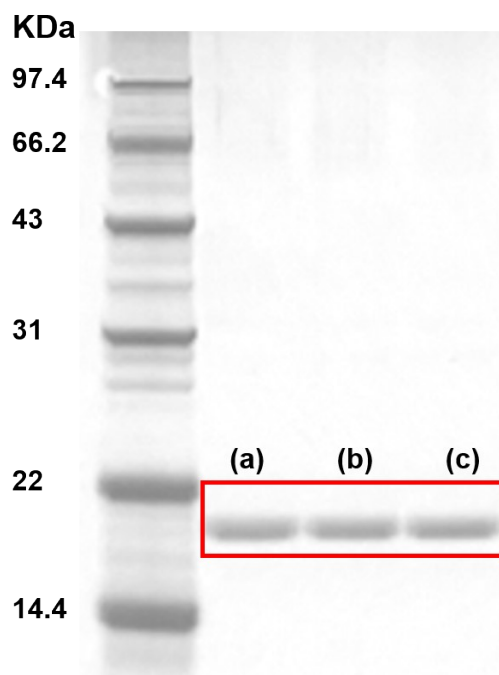

**Figure S6.** SDS-PAGE of TMV (a) and TMV@TA-Fe<sup>III</sup> freshly prepared and exfoliated with EDTA (b), TMV@TA-Fe<sup>III</sup> after heated at 37 °C for 30 days (c).
